# Supplementary material for: Efficacy and safety of glecaprevir/pibrentasvir in Japanese patients with chronic genotype 2 hepatitis C virus infection
Source: PubMed Central journal article supplement — Hepatology. 2017 Nov 24;67(2):505–13. doi: 10.1002/hep.29510 (PMC5814891; doi:10.1002/hep.29510), 2017-11-24
Supplement: HEP-67-505-s001.pdf [file HEP-67-505-s001.pdf]

## Online Supporting Information

### Efficacy and Safety of Glecaprevir/Pibrentasvir in Japanese Patients with Chronic Genotype 2 Hepatitis C Virus Infection with and without Cirrhosis

Hidegori Toyoda<sup>1</sup>, Kazuaki Chayama<sup>2</sup>, Fumitaka Suzuki<sup>3</sup>, Ken Sato<sup>4</sup>, Tomofumi Atarashi<sup>5</sup>, Tsunamasa Watanabe<sup>6</sup>, Masanori Atsukawa<sup>7</sup>, Atsushi Naganuma<sup>8</sup>, Kazuo Notsumata<sup>9</sup>, Yukio Osaki<sup>10</sup>, Makoto Nakamuta<sup>11</sup>, Koichi Takaguchi<sup>12</sup>, Satoru Saito<sup>13</sup>, Koji Kato<sup>14</sup>, David Pugatch<sup>14</sup>, Margaret Burroughs<sup>14</sup>, Rebecca Redman<sup>14</sup>, Katia Alves<sup>14</sup>, Tami J. Pilot-Matias<sup>14</sup>, Rajneet K. Oberoi<sup>14</sup>, Bo Fu<sup>14</sup>, Hiromitsu Kumada<sup>3</sup>

#### Table of contents

|                                          |   |
|------------------------------------------|---|
| Eligibility Criteria for CERTAIN-1 ..... | 3 |
| Inclusion .....                          | 3 |
| Exclusion .....                          | 5 |
| Eligibility Criteria for CERTAIN-2 ..... | 7 |
| Inclusion .....                          | 7 |
| Exclusion .....                          | 9 |

Supporting Figure 1. Patient disposition..... 12

Supporting Table 1. Abnormal laboratory results exclusion criteria.....9

Supporting Table 2. Prevalence of Baseline Polymorphisms.....10

## Eligibility Criteria for CERTAIN-1

### Inclusion

1. Japanese male or female subjects at least 18 years of age at time of screening.
2. Female who is not of childbearing potential or of childbearing potential and sexually active with male partner(s) and currently using at least one effective method of birth control at the time of screening and agrees to practice one effective method of birth control while receiving study drugs starting with Screening and for 30 days after stopping study drug.
3. Sexually active males must be surgically sterile, or if sexually active with female partner(s) of childbearing potential must agree to practice one effective form of birth control starting with Screening and through 30 days after completion of the study drug.
4. Screening central laboratory result indicating HCV single genotype infection for the appropriate treatment arm, without co-infection of any other genotype.
5. Subject has positive anti-HCV Ab and plasma HCV RNA viral load  $\geq 1000$  IU/mL at Screening Visit.
6. Chronic HCV infection defined as one of the following:
  - Positive for anti-HCV antibody (Ab) and/or HCV RNA at least 6 months before Screening.
  - A liver biopsy consistent with chronic HCV infection.
7. Subject must be:

- HCV DAA treatment-naïve (i.e., patient has not received a single dose of any approved or investigational DAA). Prior HCV treatment using IFNs with or without ribavirin, is acceptable. Previous HCV IFN based treatment must have been completed  $\geq 2$  months prior to screening.

8. Must voluntarily sign and date an informed consent form, approved by an Institutional Review Board (IRB)/Independent Ethics Committee (IEC) prior to the initiation of any screening or study specific procedures.

9. Subjects must be able to understand and adhere to the study visit schedule and all other protocol requirements.

In addition to Inclusion Criteria 1 through 9, subjects with compensated cirrhosis must meet the following criteria:

11. Subject must be documented as cirrhotic, defined as meeting one of the following criteria:

- A liver biopsy within 24 months prior to or during screening demonstrating the presence of cirrhosis, e.g., a METAVIR, Batts-Ludwig, Knodell, IASL, Scheuer, New Inuyama fibrosis score  $> 3$  (including 3 – 4 or 3/4), or Laennec fibrosis score of  $> 3$ , Ishak fibrosis score of  $> 4$ ;
- A FibroScan® score of  $\geq 14.6$  kPa within 6 months of Screening or during the Screening Period;
- A screening FibroTest score of  $\geq 0.73$  and Aspartate Aminotransferase to Platelet Ratio Index (APRI)  $> 2$ ;
- A screening Discriminant Score (z) greater than zero, according to the following formula:  $z = 0.124 \times [\text{gamma-globulin (\%)}] + 0.001 \times [\text{hyaluronate } (\mu\text{g} \times \text{l}^{-1})] - 0.075 \times [\text{platelet } (\times 10^4 \text{ cells/mm}^3)] - 0.413 \times \text{gender (male, 1; female, 2)} - 2.005$ .

12. Absence of hepatocellular carcinoma (HCC) as indicated by an ultrasound, computed tomography (CT) scan or magnetic resonance imaging (MRI) showing no evidence of HCC within 3 months prior to Screening or an ultrasound with no evidence of HCC at Screening. Subjects who have an ultrasound with results suspicious of HCC followed by a subsequent CT or MRI with no evidence of HCC will be eligible for the study.

### Exclusion

1. Female who is pregnant, planning to become pregnant during the study, or breastfeeding; or male whose partner is pregnant or planning to become pregnant during the study.
2. Recent (within 6 months prior to study drug administration) history of drug or alcohol abuse that could preclude adherence to the protocol in the opinion of the investigator.
3. Positive test result at Screening for hepatitis B surface antigen (HBsAg) or anti human immunodeficiency virus antibody (HIV Ab).
4. Requirement for and inability to safely discontinue contraindicated medications or supplements at least 2 weeks or 10 half-lives (whichever is longer) prior to the first dose of any study drug.
5. Clinically significant abnormalities, other than HCV-infection, based upon the results of a medical history, physical examination, vital signs, laboratory profile, and a 12-lead electrocardiogram (ECG) that make the subject an unsuitable candidate for this study in the opinion of the investigator, including, but not limited to:
  - Uncontrolled diabetes as defined by a glycated hemoglobin (hemoglobin A1C) level > 8.5% at the Screening Visit.

- Active or suspected malignancy or history of malignancy (other than basal cell skin cancer or cervical carcinoma in situ) in the past 5 years, or any history of HCC.
- Uncontrolled cardiac, respiratory, gastrointestinal, hematologic, neurologic, psychiatric, or other medical disease or disorder, which is unrelated to the existing HCV infection.

6. Any cause of liver disease other than chronic HCV-infection, including but not limited to the following:

- Hemochromatosis, alpha-1 antitrypsin deficiency, Wilson's disease, autoimmune hepatitis, alcoholic liver disease, or steatohepatitis considered to be the primary cause of the liver disease rather than concomitant/incidental with HCV infection.

7. History of solid organ transplantation.

8. Receipt of any investigational product within a time period equal to 10 half-lives of the product, if known, or a minimum of 6 weeks (whichever is longer) prior to study drug administration.

9. Consideration by the investigator, for any reason, that the subject is an unsuitable candidate to receive G/P.

10. History of severe, life-threatening or other significant sensitivity to any study drugs or their excipients.

11. Patients who can't participate in study per local law.

12. Any current or past clinical evidence of Child-Pugh B or C classification or clinical history of decompensated liver disease such as ascites noted on physical exam, hepatic encephalopathy or variceal bleeding.

13. Screening laboratory analyses showing any of the following abnormal laboratory results:

- Estimated glomerular filtration rate (eGFR):  $< 30 \text{ mL/min/1.73 m}^2$
- Albumin:  $< \text{LLN}$  for non-cirrhotics,  $< 2.8 \text{ g/dL}$  for cirrhotics
- International normalized ratio (INR):  $\geq 1.2$  for non-cirrhotics,  $\geq 1.8$  for cirrhotics (Subjects with a known inherited blood disorder and  $\text{INR} \geq 1.2$  may be enrolled with permission of the AbbVie TA MD.)
- Hemoglobin:  $< 10 \text{ g/dL}$
- Platelets:  $< 90,000$  cells per  $\text{mm}^3$  for non-cirrhotics,  $< 50,000$  cells per  $\text{mm}^3$  for cirrhotics

## Eligibility Criteria for CERTAIN-2

### Inclusion

1. Japanese male or female subjects at least 18 years of age at time of screening.
2. Female who is not of childbearing potential or of childbearing potential and sexually active with male partner(s) and currently using at least one effective method of birth control at the time of screening and agrees to practice one effective method of birth control for subjects randomized to Arm A and two effective methods of birth control for subjects randomized to Arm B while receiving study drugs, starting with Screening and for 30 days after stopping study drug for Arm A subjects and 6 months after stopping study drug for Arm B subjects.
3. Sexually active males must be surgically sterile, or if sexually active with female partner(s) of childbearing potential must agree to practice one effective form of birth control starting with Screening and through 30 days after completion of the study drug for Arm A subjects and 6 months after stopping study drug for Arm B subjects. .

4. Screening central laboratory result indicating HCV GT2-infection without co-infection of any other genotype.

5. Subject has positive anti-HCV Ab and plasma HCV RNA viral load  $\geq 1000$  IU/mL at Screening Visit.

6. Chronic HCV infection defined as one of the following:

- Positive for anti-HCV antibody (Ab) and/or HCV RNA at least 6 months before Screening; or
- A liver biopsy consistent with chronic HCV infection.

7. Subject must be HCV DAA treatment-naïve (i.e., patient has not received a single dose of any approved or investigational DAA). Prior HCV treatment using IFNs with or without ribavirin is acceptable. Previous HCV IFN based treatment must have been completed  $\geq 2$  months prior to screening.

8. Must voluntarily sign and date an informed consent form, approved by an Institutional Review Board (IRB)/Independent Ethics Committee (IEC) prior to the initiation of any screening or study specific procedures.

9. Subjects must be able to understand and adhere to the study visit schedule and all other protocol requirements.

10. Subject must be documented as non-cirrhotic, defined as meeting one of the following criteria:

- A liver biopsy within 24 months prior to or during screening demonstrating the absence of cirrhosis, e.g., a METAVIR, Batts-Ludwig, Knodell, IASL, Scheuer, New Inuyama or Laennec fibrosis score of  $\leq 3$ , Ishak fibrosis score of  $\leq 4$ ;
- A FibroScan® score of  $< 12.5$  kPa within 6 months of Screening or during the Screening Period;



- A screening FibroTest score of  $\leq 0.72$  and Aspartate Aminotransferase to Platelet Ratio Index (APRI)  $\leq 2$ ;
- A screening Discriminant Score (z) less than zero, according to the following formula:  $z = 0.124 \times [\text{gamma-globulin (\%)}] + 0.001 \times [\text{hyaluronate } (\mu\text{g}\times\text{l}^{-1})] - 0.075 \times [\text{platelet } (\times 10^4 \text{ cells/mm}^3)] - 0.413 \times \text{gender (male, 1; female, 2)} - 2.005$ .

## Exclusion

1. Female who is pregnant, planning to become pregnant during the study, or breastfeeding; or male whose partner is pregnant or planning to become pregnant during the study.
2. Recent (within 6 months prior to study drug administration) history of drug or alcohol abuse that could preclude adherence to the protocol in the opinion of the investigator.
3. Positive test result at Screening for hepatitis B surface antigen (HBsAg) or anti human immunodeficiency virus antibody (HIV Ab).
4. Requirement for and inability to safely discontinue contraindicated medications or supplements at least 2 weeks or 10 half-lives (whichever is longer) prior to the first dose of any study drug.
5. Clinically significant abnormalities, other than HCV-infection, based upon the results of a medical history, physical examination, vital signs, laboratory profile, and a 12-lead electrocardiogram (ECG) that make the subject an unsuitable candidate for this study in the opinion of the investigator, including, but not limited to:
  - Uncontrolled diabetes as defined by a glycated hemoglobin (hemoglobin A1C) level  $> 8.5\%$  at the Screening Visit.
  - Active or suspected malignancy or history of malignancy (other than basal cell skin cancer or cervical carcinoma in situ) in the past 5 years, or any history of HCC.

- Uncontrolled cardiac, respiratory, gastrointestinal, hematologic, neurologic, psychiatric, or other medical disease or disorder, which is unrelated to the existing HCV infection.
6. Any cause of liver disease other than chronic HCV-infection, including but not limited to the following:
- Hemochromatosis, alpha-1 antitrypsin deficiency, Wilson's disease, autoimmune hepatitis, alcoholic liver disease, or steatohepatitis considered to be the primary cause of the liver disease rather than concomitant/incidental with HCV infection.
7. History of solid organ transplantation.
8. Receipt of any investigational product within a time period equal to 10 half-lives of the product, if known, or a minimum of 6 weeks (whichever is longer) prior to study drug administration.
9. Consideration by the investigator, for any reason, that the subject is an unsuitable candidate to receive ABT-493/ABT-530.
10. History of severe, life-threatening or other significant sensitivity to any excipients of the study drug.
11. Patients who can't participate in study per local law.
12. Any current or past clinical evidence of Child-Pugh B or C classification or clinical history of decompensated liver disease such as ascites noted on physical exam, hepatic encephalopathy or variceal bleeding.
13. Screening laboratory analyses showing any of the following abnormal laboratory results:
- Creatine Clearance (CrCL)  $\leq$  50 mL/min
  - Albumin: < LLN

- International normalized ratio (INR):  $\geq 1.2$  (Subjects with a known inherited blood disorder and INR  $\geq 1.2$  may be enrolled with permission of the AbbVie TA MD.)
- Hemoglobin:  $< 12$  g/dL
- Platelets:  $< 90,000$  cells per  $\text{mm}^3$

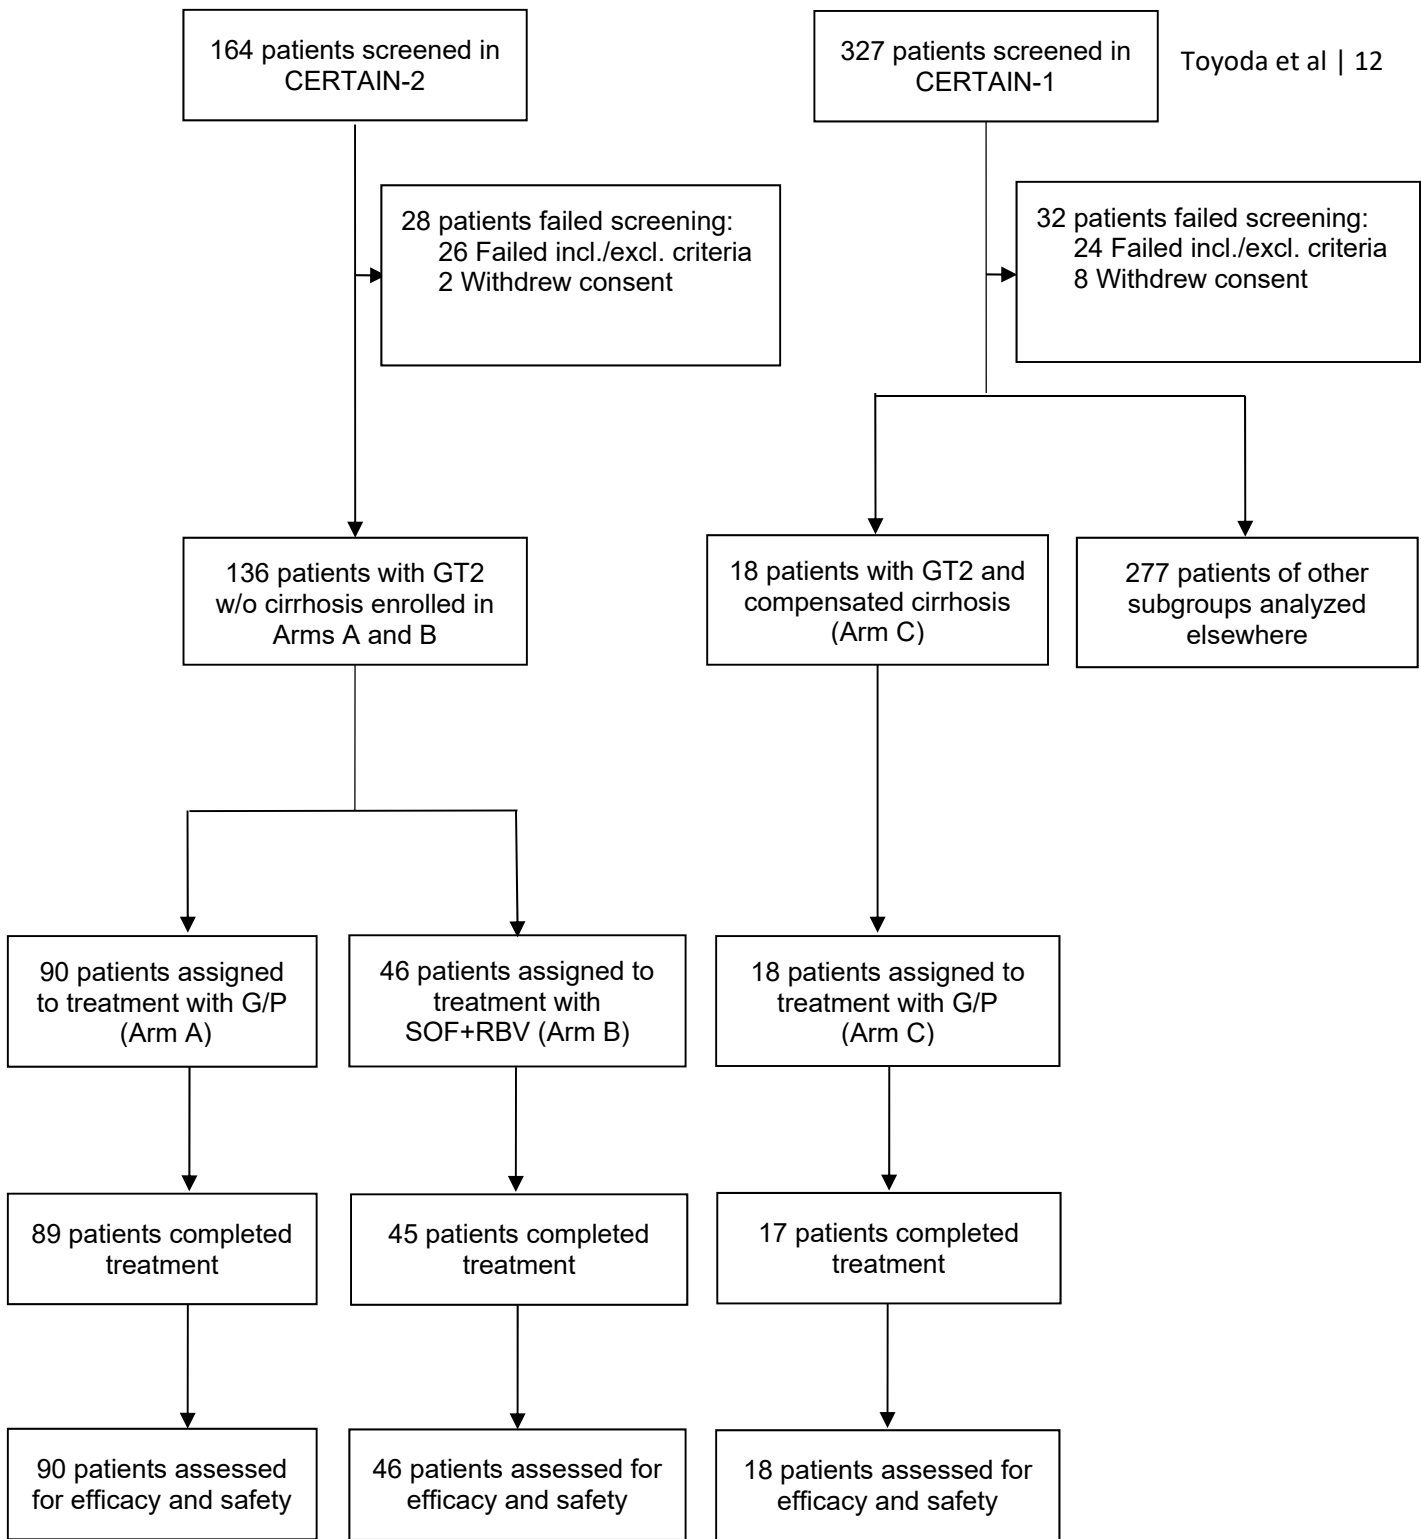

**Supporting Figure 1. Patient disposition.**

**Supporting Table 1. Abnormal laboratory results exclusion criteria for patients without cirrhosis enrolled in CERTAIN-2 and patients with compensated cirrhosis enrolled in CERTAIN-1 Substudy 2 Arm C.**

| <b>Assessment</b>                     | <b>No cirrhosis</b> | <b>Compensated Cirrhosis</b> |
|---------------------------------------|---------------------|------------------------------|
| eGFR*, mL/min/1.73m <sup>2</sup>      | N/A                 | <30                          |
| CrCl, mL/min                          | ≤50                 | N/A                          |
| Serum albumin, g/dL                   | <LLN                | <2.8                         |
| INR                                   | ≥1.2                | ≥1.8                         |
| Hemoglobin, g/dL                      | <12                 | <10                          |
| Platelet count, cells/mm <sup>3</sup> | <90,000             | <50,000                      |

INR, International normalized ratio; LLN, lower limit of normal;

\*eGFR, estimated glomerular filtration rate (using the MDRD method modified for Japanese population:  $eGFR = 194 \times \text{Serum Creatinine}^{-1.094} \times \text{Age}^{-0.287} \times 0.739$  [if female])

**Supporting Table 2. Prevalence of Baseline Polymorphisms.**

| HCV<br>Subtype | Target | Polymorphism | Non-cirrhotic Patients | Cirrhotic Patients      |
|----------------|--------|--------------|------------------------|-------------------------|
|                |        |              | 8-weeks G/P<br>n/N (%) | 12-weeks G/P<br>n/N (%) |
| 2a             | NS3    | D168E        | 1/65 (1.5)             | -                       |
|                | NS5A   | T24A/S       | 3/65 (4.6)             | 2/10 (20.0)             |
|                |        | F28C/L       | 2/65 (3.1)             | -                       |
|                |        | L31M         | 61/65 (93.8)           | 8/10 (80.0)             |
|                |        | P58S         | 4/65 (6.2)             | 2/10 (20.0)             |
|                |        | C92N/S       | 3/65 (4.6)             | -                       |
| 2b             | NS3    | none         | -                      | -                       |
|                | NS5A   | L28F         | 2/25 (8.0)             | 3/10 (30.0)             |
|                |        | M31I/L/V     | 6/25 (18.0)            | -                       |
|                |        | P58S         | 1/25 (4.0)             | 1/10 (10.0)             |

\*Specific polymorphisms relative to reference sequence using a 15% detection threshold at the following amino acid positions: 155, 156, 168 in NS3; 24, 28, 30, 31, 58, 92, 93 in NS5A.
